# Supplementary material for: Coronary CT angiography characteristics of OCT-defined thin-cap fibroatheroma: a section-to-section comparison study
Source: Springer Nature journal article supplement (doi:10.1007/s00330-017-4992-8), 2017-08-23
Supplement: MOESM2 [file 14235494]

**Online Table 2. Receiver operating characteristics analysis of quantitative CCTA measurements for detection of OCT-TCFA in per-section level.**

| CCTA parameters | AUC | Sensitivity | Specificity | P-value | Cut-off |
| --- | --- | --- | --- | --- | --- |
| Lumen diameter | 0.573 (0.536 – 0.609) | 47.8 | 67.3 | 0.056 | < 2.0 |
| Lumen area | 0.601 (0.565 – 0.637) | 39.1 | 83.5 | **0.008** | < 3.1 |
| Total plaque area | 0.633 (0.597 – 0.668) | 71.0 | 58.8 | **< 0.001** | > 10.6 |
| Total plaque burden | 0.654 (0.618 – 0.689) | 66.6 | 58.6 | **< 0.001** | > 64.8 |
| Calcified plaque area | 0.584 (0.516 – 0.650) | 76.4 | 48.0 | 0.176 | < 3.1 |
| Non-calcified plaque area | 0.673 (0.638 – 0.707) | 69.5 | 69.9 | **< 0.001** | > 10.6 |
| Non-calcified plaque attenuation | 0.620 (0.584 – 0.655) | 49.2 | 76.1 | **0.001** | < 116 |
| Low attenuation plaque area | 0.611 (0.529 – 0.688) | 89.4 | 29.0 | **0.032** | > 1.2 |
| Diameter stenosis | 0.535 (0.495 – 0.575) | 53.2 | 57.0 | 0.380 | > 29.2 |
| Area stenosis | 0.565 (0.524 – 0.604) | 61.3 | 56.2 | 0.104 | > 41.0 |
| Remodelling index | 0.604 (0.568 – 0.640) | 57.9 | 65.5 | **0.002** | > 1.2 |

AUC=area under the receiver operating characteristics curve CCTA=coronary computed tomography angiography; OCT=optical coherence tomography
